## **Cross-sectional evaluation of an asynchronous Multiple Mini Interview (MMI) in selection to health professions training programmes with ten principles for fairness built-in**

### Authors

Primary author: Dr Alison Callwood<sup>1</sup> Faculty of Health and Medical Sciences, University of Surrey, UK

Dr Jenny Harris<sup>1</sup>

Dr Lee Gillam<sup>2</sup> Faculty of Engineering and Physical Sciences, University of Surrey, UK

Mrs Sarah Roberts<sup>1</sup>

Angela Kubacki<sup>3</sup> St George's University of London, UK

P Tiffin<sup>4</sup> University of York, UK

### Competing interest statement

Authors AC and LG are co-founders and Ach is an employee of Sammi-Select Lt, funded by UKRI as a spinout company from the University of Surrey to build the platform.

### Ethical approval

The study received a favourable ethical opinion from the Universities Research Ethics Committee (UEC/2017/111/FHMS). All participants sharing personal data gave informed consent.

### Ethics

This study received a favourable ethical opinion (FEO) from the University Research Ethics committee (UEC/2017/111/FHMS). Participants gave informed consent where personal data was included.

**NOTE: This preprint reports new research that has not been certified by peer review and should not be used to guide clinical practice.**

## **Abstract**

### **Objectives**

Ensuring equity, inclusivity, and diversity in health professions selection is an ethical and practical imperative. We have built the first known online asynchronous Multiple Mini-Interview (MMI). We aimed to explore psychometric properties for all users with sub-group analysis by key characteristics, acceptability, and usability.

### **Design, setting, participants.**

Cross-discipline multi-method evaluation with applicants to Nursing, Midwifery and Paramedic Science under-graduate programmes from one UK university (2021/2022).

### **Primary, secondary outcome measures**

Psychometric properties (internal consistency, construct validity, dimensionality) were assessed using Cronbach's alpha ( $\alpha$ ), parallel analysis (PA), Schmid-Leiman transformation and ordinal confirmatory factor analysis (CFA). Usability and acceptability were evaluated using descriptive statistics and conventional content analysis.

### **Methods**

The system was configured in a seven question four-minute MMI. Applicants' video-recorded their answers which were later assessed by interviewers and scores summed. Applicants and interviewers completed online evaluation questionnaires.

### **Results**

Performance data from 712 applicants determined good-excellent reliability for the asynchronous MMI assessment (mean  $\alpha$  0.72) with similar results across sub-groups (gender, age, disability/support needs, UK/non-UK). Parallel analysis and factor analysis results suggested that there were seven factors relating to the MMI questions with an underlying general factor that explained the variance in observed candidate responses. A confirmatory factor analysis testing a seven-factor hierarchical model showed an excellent fit to the data (Confirmatory Fit Index =0.99), Tucker Lewis Index =0.99, RMSE=0.034).

Applicants (n=210) viewed the flexibility, relaxed environment, and cost savings advantageous. Interviewers (n=65) reported the system intuitive, flexible with >70% time saved compared to face-to-face interviews. Reduced personal communication was cited as the principle disadvantage.

### **Conclusions**

Our findings suggest that the asynchronous MMI is reliable, time-efficient, fair, and acceptable. In the absence of any known precedent, these internationally applicable, cross discipline insights inform the future configuration of online interviews where building-in principles for fairness are relatively straight forward to implement.

### Study strengths and limitations

- The theoretical approach aligned with an iterative process necessary to design a new technology to reduce bias.
- The large sample enabled us to assess psychometric properties with sub-group analysis for the first time in this context.
- The study provides perspectives from one large site; a necessary step to inform a planned international multi-site evaluation.
- The multi-method design provided insights necessary to embed fairness into online selection approaches in the absence of best practice guidance.

## Introduction

Ensuring equity, inclusivity, and diversity in selection to health professions training programmes is recognised internationally as an ethical and practical imperative<sup>1,2</sup>. Globalisation and increased workforce pressures amplify this challenge<sup>3</sup>. Fulfilling our responsibility to ensure fair selection is complex due to unintended biases that are intrinsic to human assessment compounded by recent unprecedented change to online interviews in the absence of published evidence<sup>4-6</sup>.

We understand that the adoption of new technologies in recruitment can be associated with substantial risk, as well as opportunity<sup>7</sup>. Historically, health professions' selection has been mainly face-to-face using unstructured or structured approaches including panel interviews, group interviews, assessment centres and multiple mini-interviews (MMIs)<sup>8</sup>. MMIs are a series of short, focused interactions with a number of different interviewers. The multi-question format featuring structured scoring proforma with interviewers who have no prior knowledge of applicants, is designed to mitigate the potential impact of interviewer bias<sup>9</sup>. MMIs have been shown to be a feasible, acceptable, valid, and reliable candidate selection approach across health professions. None-the-less, as a face-to-face method, MMIs can be costly, resource intensive and influenced by unintended bias<sup>10</sup>.

The modality of interviews has changed dramatically in recent years. Pre-pandemic online interviews were a relatively uncommon occurrence in selection to health professions with limited evidence supporting or refuting their effectiveness. Approaches included Skype-based MMIs, asynchronous MMIs and asynchronous panel interviews<sup>11</sup>. Research outside the field of healthcare has shown asynchronous video interviews to be faster, cheaper, and require less employee time, easing scheduling burden and allowing for more applicants to be screened<sup>12</sup>. This can potentially increase the number of applicants who would have otherwise not had the opportunity to be interviewed.

During the pandemic, it was vital to ensure the continuance of recruitment to health professions. This resulted in rapid adaption to using online interviews facilitated by videoconference technology<sup>13,14</sup>. Recent research suggests online interviews like MMIs are feasible and acceptable provided reliable high-speed internet connection is available. However, access to reliable Wi-Fi is not always possible<sup>11</sup>. In an asynchronous approach, applicants record their interviews at a convenient time and place, alleviating the stress of potential technical issues.

In live synchronous interviews, nuanced inconsistencies in, for example, tone and intonation, can arise in the way interviewers ask questions. Consistency of questioning across applicants is assured in asynchronous interviews through the use of pre-recorded interview questions. Fairness is further ensured with the avoidance of nonadherence to set questions which can occur in live interviews when applicants and interviewers serendipitously find something in common and deviate to discuss this<sup>12,15</sup>. Moreover, evidence from recruitment to the police force demonstrates that fairness can also be optimised through incorporating language that supports the affirmation of values with increased probability of minority applicants passing an assessment by 50%.<sup>16,17</sup>.

'Fairness' in this article is conceptualised as the quality of treating people equally or in a way that is right or reasonable. That encapsulates perceived fairness by participants as well as that borne out

in the data. Consensus on the design of online interviews to optimise applicant accessibility and usability and mitigate potential unfairness issues for people across demographics, abilities, and disabilities is not readily available<sup>15</sup>. To address this, we successfully applied to Innovate UK, the United Kingdom's innovation agency (2020-2021) to build and evaluate what we believe was, the first (proof-of-concept, PoC) asynchronous videoconference facilitated interview and assessment system uniquely grounded in the MMI method (Figure 1).

Figure 1: Asynchronous MMI infographic.

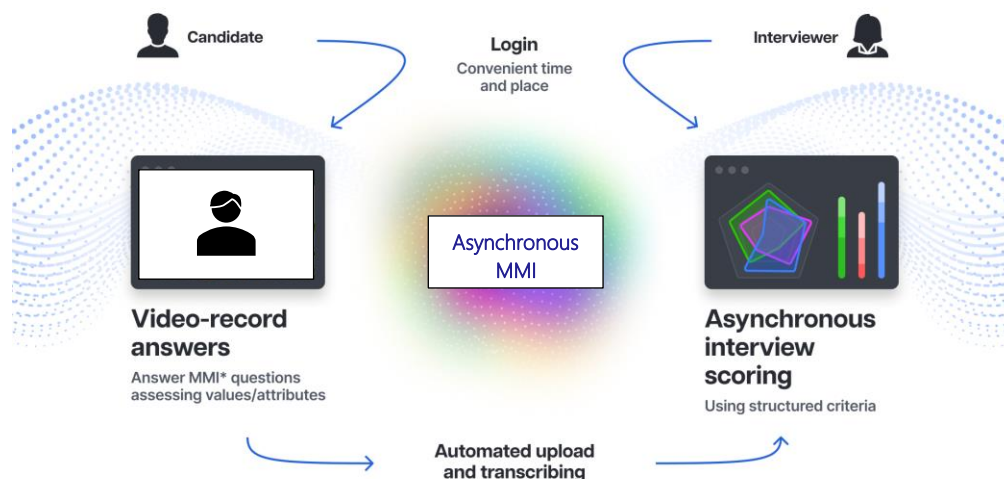

### *Development summary*

The asynchronous MMI is an on-demand videoconference interview where applicants log onto an online portal to complete their interview. The interview is a remote experience, where the system records applicants' short video responses to MMI questions in a timed process emulating the face-to-face MMI method. There is no synchronous, bidirectional communication, and no interviewer to interact with; instead, questions are pre-recorded by interviewers. Applicants' recorded responses are scored by an interview assessor at a convenient later date.

Once the PoC system was built, our vision was to ensure equitable access. To inform the design, we undertook a rapid review of literature published between 2011-2021, guided by a five-stage process<sup>18</sup> to help us understand how video-based interviews compare with face-to-face in terms of implementation and fairness including what makes for an optimised experience.

The databases searched included: Medline, PsycInfo, Embase, ProQuest (BNI) and Google Scholar/Google (grey literature). We included original articles published in English that reported studies involving candidates interviewed using video with/without face-to-face methods in health professions selection. Articles focusing on psychometric tests and situational judgement tests were excluded. For quality appraisal we used the Mixed Methods Appraisal Tool (MMAT)<sup>19</sup> combined with independent reviewer screening.

After review and removal of irrelevant and duplicates, 49 articles were included, 27 published pre-Covid (before Jan 2020) and 22 between Jan 2020 – Oct 2021 (Appendix 1). Of these, >90% originated in the US, the rest from Australia, Korea, and the UK. The majority were conducted in admissions to Medicine with two from Pharmacy and one Veterinary Medicine. Study methodologies included single site cross-sectional/cohort or quasi-experimental studies. Meta-analysis/meta-synthesis were not possible due to study heterogeneity. Each article was read by up to two of the research team looking for insights and recommendations to optimise accessibility and fairness in online interviews. Indicative themes were elicited and assimilated into ten key principles. These included:

- Recognise potential issues with stereotype threats and belonging uncertainty that may impact on candidates' performance and use language that supports the affirmation of values e.g., "well done for getting this far".
- Incorporate encouraging words/phrases into the interview dialogue, as well as any communications circulated to applicants (e.g., "good luck").
- Soften the language of technical instructions e.g., "when you are ready ..." or "when you have familiarised yourself with...".
- Reduce the verbal load of interview content particularly for neurodiverse applicants.
- Accommodate access and engagement for neurodiverse applicants with extra time, adjusted fonts and a tailored user-interface (UI) including background colours.
- Provide opportunities for candidates to familiarise themselves with the UI and format prior to their interview through a practice portal.
- Recommend generic, blank backgrounds for video or videoconference facilitated interviews or, if not possible, advise blurred backdrops.
- Ensure diversity of interviewers for pre-recorded videos and those assessing them including gender, age and ethnicity, experts-by-experience, and other stakeholders.
- Avoid culturally sensitive subject areas, language, age and ability bias in interview content.
- Ensure the use of inclusive, gender-neutral language with appropriate pronouns e.g., 'they/them/their'.

In Autumn 2021, the online asynchronous MMI system was re-configured to include these ten key principles. A summary of the development process of the asynchronous MMI system has been included for completeness and transparency.

The focus of this paper is to detail the study undertaken to evaluate the psychometric properties of the asynchronous MMI. We aimed to explore reliability (internal consistency) for all users with subgroup analysis by key characteristics (age, gender, nationality, disability/additional support needs), construct validity, dimensionality, acceptability, and usability.

In this context disability refers to a person who self-identifies with physical or mental impairment, and the impairment has a substantial and long-term adverse effect on the person's ability to carry out normal day-to-day activities. Not all neurodivergent people consider themselves 'disabled' but instead neurological conditions are viewed a result of normal variations in the human genome but where additional support might be required. We therefore use the term 'support need' to include neurodiverse applicants.

## Methods

The MMI questions were developed and tested by the university's community emulating our previously established in-person processes. A diverse range of individuals including academic staff, service users and practice partners were individually videorecorded asking MMI questions. The video recordings were uploaded onto the system, which was configured in a seven question, four-minute MMI with one minute between questions.

The asynchronous online MMI system was adopted for selection to Health Professions undergraduate programmes (Adult, Child, Mental Health Nursing, Midwifery, and Paramedic Science) at one UK university during 2021/22 recruitment cycle. All applicants to these programmes were invited to register for a one-week slot that was convenient for them. At the start of their selected slot, applicants were emailed a link to the system. Here they could access the practice portal to check their Wi-Fi speed, familiarise themselves with the user interface/key functionality, become conversant with the process through a detailed instructional video, and practice a question. When they felt prepared, they could start their MMI. To emulate our previous in-person process, once they had begun, applicants could not stop their MMI and start again. Any technical issues including Wi-Fi connectivity were handled on an individual basis.

All individuals at the university who would usually interview applicants as part of their role took part in this new process. These included academic staff, service users and practice partners. They were invited to self-allocate to one-week interview assessment slots. Thereafter they received a link and code to access the system to review and assess applicant interviews against uploaded scoring rubrics live on the system. Each interviewer was allocated a number of applicant's video responses to a single question thereby aligning with the principles of an MMI. Also, emulating MMI methodology, a 'red flag' option could be ticked, and details populated in a text box if a cause for concern was raised in applicants' answers. Applicant's performance scores were downloaded at the end of the process to inform offer/reject decisions by university Admissions Officers.

## Design

This dual paradigmatic cross-sectional study was theoretically underpinned by Olsen and Eoyang's theory of 'Complex Adaptive Systems'<sup>20</sup>. This theory is characterised by an adaptive and iterative working style. This approach was appropriate when developing and optimising the system for fairness and reliability in the absence of any known precedent. We also grounded the system design in Gilliland's<sup>21</sup> justice-based model. According to their theory, a selection system's adherence to procedural and distributive justice rules promotes applicants' perceptions of fairness. Procedural justice rules relate to the approach used to derive decisions, in this case an asynchronous MMIs. It includes the formal process (opportunity to perform and administration), explanation (feedback, information, and transparency), and interpersonal communication throughout the selection process. Distributive justice rules encompass adherence to equity when determining selection outcomes<sup>21</sup>.

## Participant recruitment

All applicants (n=712 at the data collection point) to the UK university and all interviewers (n=96) who assessed applicants were invited to evaluate the system.

## Patient and Public Involvement

The university's service user group were supportive of the move to online asynchronous interviews. One service user acted as an interviewer by videorecording an MMI question. A further three were interview assessors, thereby continuing an established model at this university of service user involvement in recruitment. The service user group were also involved in the MMI question writing by reviewing draft questions and providing feedback. In the seven-question circuit, one practice partner video recorded an MMI question and eight assessed applicants' videos.

## **Data Collection**

Applicant interview performance data, routinely collected to inform offer/reject decisions, were used in the reliability analyses. Applicant interviews were scored against 10 question-specific criteria on a seven-point Likert-type scale with descriptive anchors for the seven questions. Criteria details are withheld for test security. Applicant interview scores were summed for each applicant.

To assess usability, applicants were invited to complete an online evaluation questionnaire hosted on Qualtrics<sup>22</sup> once they had received their interview outcome decision.

To assess acceptability, interviewers were invited to evaluate the process at the end of the recruitment cycle through an online questionnaire also hosted on Qualtrics<sup>22</sup>.

## **Analysis**

We used applicant scores across questions to explore reliability (internal consistency) for all users and a randomly selected sub-sample self-reporting key characteristic including gender, age (<20 or 20+), nationality (UK/non-UK) and disability/support needs (absence/presence) using Cronbach's alpha (Stata, version 15.1, StataCorp LLC<sup>23</sup>) and scale dimensionality/construct validity using parallel analysis and confirmatory factor analysis (CFA)<sup>24,25</sup>. The parallel analysis and reliability values were derived using the software package FACTOR<sup>26</sup>. The ordinal factor analyses were conducted in Mplus<sup>27</sup> version 8.8. Usability and acceptability were explored with descriptive statistics (closed questions) and conventional content analysis<sup>28</sup> (open questions).

## **Results**

### ***Sample Characteristics***

Data were available from 712 applicants to Nursing, Midwifery and Paramedic Science programmes at the data collection point on 1<sup>st</sup> May 2022 (Table 1) and for key characteristics for the sub-sample (n= 284) (Table A). Disabilities self-reported by interviewers were reduced hearing and visual acuity. Applicants reported neurodiverse challenges across the spectrum of dyslexia, dyspraxia, and attention deficit hyperactivity disorder (ADHD).



Table A: Participant self-identified characteristics

| Interview Assessors n= 65           |                                                                                                               |    |    | Applicant Sub-sample n=284                                       |     |     |
|-------------------------------------|---------------------------------------------------------------------------------------------------------------|----|----|------------------------------------------------------------------|-----|-----|
|                                     |                                                                                                               | N  | %  |                                                                  | N   | %   |
| Age (years)                         | 25 and under                                                                                                  | 0  | 0  | <20                                                              | 193 | 68  |
|                                     | 26-35                                                                                                         | 8  | 13 |                                                                  |     |     |
|                                     | 36-45                                                                                                         | 18 | 28 | >20                                                              | 91  | 32  |
|                                     | 45+                                                                                                           | 35 | 53 |                                                                  |     |     |
|                                     | Prefer not to say                                                                                             | 4  | 6  |                                                                  |     |     |
| Gender                              | Female                                                                                                        | 55 | 84 | Female                                                           | 230 | 81  |
|                                     | Male                                                                                                          | 7  | 10 | Male                                                             | 54  | 19  |
|                                     | Other                                                                                                         | 0  | 0  | Other                                                            | 0   | 0   |
|                                     | Prefer not to say                                                                                             | 3  | 6  | Prefer not to say                                                | 0   | 0   |
| Disability/additional support needs | No                                                                                                            | 60 | 93 | No                                                               | 228 | 80  |
|                                     | Yes                                                                                                           | 5  | 7  | Yes (64% neurodiverse, 34% mental health, 2% hearing challenges) | 58  | 20  |
|                                     | Prefer not to say                                                                                             | 0  | 0  | Prefer not to say                                                | 0   | 0   |
| Ethnicity                           | White (English/Welsh/Scottish/Northern Irish, Irish, Gypsy, Irish Traveller, Other White background)          | 61 | 94 | UK/Ireland                                                       | 229 | 81  |
|                                     | Mixed/multiple Ethnic Groups (White and Black Caribbean, White and Black African, Any other Mixed Background) | 2  | 3  | Non-UK/Ireland                                                   | 55  | 19  |
|                                     | Asian/Asian British (Indian, Pakistani, Bangladeshi, Chinese, Any other Asian background)                     | 0  | 0  | N/A                                                              | N/A | N/A |
|                                     | Other (Arab, any other ethnic group)                                                                          | 0  | 0  |                                                                  |     |     |
|                                     | Prefer not to say                                                                                             | 2  | 3  |                                                                  |     |     |
|                                     |                                                                                                               |    |    | N/A                                                              | N/A | N/A |
| Role                                | University Health Sciences Staff                                                                              | 46 | 71 |                                                                  |     |     |
|                                     | Practice Partner                                                                                              | 10 | 16 |                                                                  |     |     |
|                                     | Service user                                                                                                  | 9  | 13 |                                                                  |     |     |
|                                     | Prefer not to say                                                                                             | 0  | 0  |                                                                  |     |     |

### Reliability and assessment of fairness

#### Reliability

Applicant data were shown to be normally distributed (Kurtosis 0.000, p 0.005) and symmetrical with skewness 1.0.

Internal consistency was good-excellent across questions (for n=712 applicants) within each scenario (mean Cronbach's  $\alpha$  0.72 (range 0.64-0.89). Sub-group analyses showed similarly positive results with mean  $\alpha$  Female/Male: 0.74/0.87 (range 0.70-0.89); age: <20years/ >21 years 0.76/0.83 (range 0.72-0.86), disability/additional challenges/non-disability: 0.78/0.88 (range 0.74-0.89) and UK/non-UK 0.78/0.77 (range 0.72-0.83) (Table B).

### *Dimensionality/construct validity*

The results of the parallel analysis suggested a maximum of seven dimensions underlay the response pattern. A Schmid-Leiman<sup>29</sup> transformation can be used to understand if a factor analytic model is best understood as a hierarchical in nature. This partitions observed variance into that explained by one or more general ('G') factors underlying three or more specific factors (a hierarchical model will be mathematically 'just identified' by three factors)<sup>29</sup>. The results of the Schmid-Leiman transformed factor analysis indicated a seven factor solution, relating to the MMI scenarios, with an underlying general factor which substantially loaded on all the former seven factors. An ordinal Confirmatory Factor Analysis (CFA) to test this seven-factor hierarchical model showed an excellent fit to the data (Confirmatory Fit Index (CFI)=0.99, Tucker Lewis Index (TLI)=0.99, RMSE=0.034). In contrast, a one factor model showed a poor fit to the response data (CFI=0.70, TLI=0.69, RMSEA=0.19).

The results of the parallel analysis suggested a maximum number of seven plausible factors. The variance explained by additional postulated factors did not exceed that observed for the random data generated. (Appendix 2).

Table B MMI question reliability (internal consistency) N=712

| Question<br>(total mean)      | Obs              | Mean                      | St Dev                      | Min              | Max | Item-test<br>correlation | Item-rest<br>correlation | Cronbach's<br>alpha |
|-------------------------------|------------------|---------------------------|-----------------------------|------------------|-----|--------------------------|--------------------------|---------------------|
| 1                             | 765              | 48.6732                   | 10.3966                     | 10               | 70  | 0.6541                   | 0.4677                   | 0.68                |
| 2                             | 795              | 51.57107                  | 9.70229                     | 10               | 70  | 0.6434                   | 0.4532                   | 0.67                |
| 3                             | 790              | 51.08101                  | 9.10597                     | 10               | 70  | 0.599                    | 0.421                    | 0.69                |
| 4                             | 809              | 50.23486                  | 8.97655                     | 10               | 70  | 0.5826                   | 0.4001                   | 0.70                |
| 5                             | 762              | 50.27428                  | 9.88047                     | 10               | 70  | 0.6624                   | 0.4941                   | 0.67                |
| 6                             | 765              | 51.79869                  | 8.7486                      | 20               | 70  | 0.6132                   | 0.4484                   | 0.69                |
| 7                             | 712              | 50.10499                  | 11.0865                     | 14               | 70  | 0.6076                   | 0.3871                   | 0.70                |
| Scale reliability coefficient |                  |                           |                             |                  |     |                          |                          | 0.7216              |
|                               |                  |                           |                             |                  |     |                          |                          |                     |
| Sub-group reliability n=284   |                  |                           |                             |                  |     |                          |                          |                     |
| Question<br>(total<br>score)  | Cronbach's alpha |                           |                             |                  |     |                          |                          |                     |
|                               | Age              | Self-identified<br>gender | Self-declared<br>disability | Country of birth |     |                          |                          |                     |

|      | < 20 years | > 20 years | Female | Male | Yes  | Non  | UK/Ireland | Non-UK/Ireland |
|------|------------|------------|--------|------|------|------|------------|----------------|
| 1    | 0.74       | 0.83       | 0.73   | 0.87 | 0.88 | 0.76 | 0.78       | 0.74           |
| 2    | 0.74       | 0.83       | 0.72   | 0.87 | 0.88 | 0.76 | 0.77       | 0.75           |
| 3    | 0.75       | 0.83       | 0.74   | 0.87 | 0.87 | 0.77 | 0.78       | 0.77           |
| 4    | 0.77       | 0.85       | 0.76   | 0.89 | 0.88 | 0.79 | 0.79       | 0.79           |
| 5    | 0.73       | 0.82       | 0.71   | 0.86 | 0.87 | 0.75 | 0.76       | 0.73           |
| 6    | 0.77       | 0.84       | 0.76   | 0.87 | 0.87 | 0.79 | 0.79       | 0.79           |
| 7    | 0.79       | 0.87       | 0.78   | 0.88 | 0.89 | 0.80 | 0.80       | 0.86           |
| Mean | 0.78       | 0.85       | 0.77   | 0.88 | 0.89 | 0.80 | 0.8        | 0.80           |

### **Usability (applicants)**

The online evaluation was completed by 210 applicants (29% response rate). The majority were under 20 years of age, self-identified as white female and with representation from across programmes (Table C).

Table C Applicant Characteristics and usability evaluation

| N=210                                              |                   |     |     |
|----------------------------------------------------|-------------------|-----|-----|
| Demographics                                       |                   | N   | %   |
| Age                                                | <20               | 120 | 57  |
|                                                    | 20+               | 90  | 43  |
| Self-identified gender                             | Female            | 172 | 82  |
|                                                    | Male              | 36  | 17  |
|                                                    | Other/non-binary  | 2   | 1   |
| Nationality                                        | UK/Ireland        | 134 | 64  |
|                                                    | Non-UK/ Ireland   | 68  | 32  |
|                                                    | Prefer not to say | 8   | 4   |
| Programme representation                           |                   |     |     |
| Nursing                                            | Adult             | 42  | 20  |
|                                                    | Child             | 34  | 16  |
|                                                    | Mental Health     | 52  | 25  |
| Midwifery                                          |                   | 32  | 15  |
| Paramedic Science                                  |                   | 50  | 24  |
| Closed question responses summary data             |                   |     |     |
| Had not taken an asynchronous MMI like this before |                   |     | 94% |

|                                                                                                                                                                                                                                                                                                                                                                                              |                          |    |                      |    |
|----------------------------------------------------------------------------------------------------------------------------------------------------------------------------------------------------------------------------------------------------------------------------------------------------------------------------------------------------------------------------------------------|--------------------------|----|----------------------|----|
| Found the instructions helpful/very helpful                                                                                                                                                                                                                                                                                                                                                  | 90%                      |    |                      |    |
| Did not experience technical issues                                                                                                                                                                                                                                                                                                                                                          | 79%                      |    |                      |    |
| Said the one minute between questions was ‘about right’                                                                                                                                                                                                                                                                                                                                      | 75%                      |    |                      |    |
| Found the probe questions helpful/very helpful                                                                                                                                                                                                                                                                                                                                               | 66%                      |    |                      |    |
| Four minutes was about the right amount of time                                                                                                                                                                                                                                                                                                                                              | 65%                      |    |                      |    |
| Open question responses                                                                                                                                                                                                                                                                                                                                                                      |                          |    |                      |    |
| Question                                                                                                                                                                                                                                                                                                                                                                                     | Response %               |    |                      |    |
| <i>At the University of X we are putting on applicant days so you can meet academic/staff and get a feel for the University in a relaxed environment with the interview being a separate process. In this context, how do you feel about videorecording and uploading your MMI responses as part of a 'new look' interview process triggered by Covid-19 social distancing restrictions?</i> | Happy/very happy         | 67 | Not very happy       | 14 |
| <i>Please tell us about your views on online interviews generally</i>                                                                                                                                                                                                                                                                                                                        | Accepting/very accepting | 66 | Not at all accepting | 2  |
| <i>Do you see a future for online interviews like the one you have used with us?</i>                                                                                                                                                                                                                                                                                                         | Yes/definitely yes       | 68 | Definitely not       | 9  |

The majority of applicants had not undertaken an asynchronous MMI previously. Overall applicants found the instructions either helpful or very helpful and did not experience any technical issues. From a setup perspective, four minutes was considered the right amount of time by over half with one-third stating it was too short. We asked additional overarching open questions regarding applicants' views on online interviews (Table C) as well as their overall 'top' positives and 'top' negatives of system (Table D).

We received 158 separate positive comments and 140 negative comments in relation to the questions asking for 'top' positives and 'top' negatives. Notably, 93% of the positive comments centred around three themes: Ease (40%), reduced stress (28%) and fair (25%). We received fewer negative comments overall and these were split into two main themes: limited direct communication (34%) and critique of the MMI process itself (32%). Nineteen percent of respondents raised technical issues as a potential negative issue. However, it appears that as around 80% did not experience these in reality, this was more an anticipated concern rather than an experienced issue. The twelve respondents that did experience technical issues cited: buffering (3), frozen screen (2), crash (2), video skipping (2), screen scaling (1), microphone (1) and upload (1). They all subsequently successfully completed their interview at a second attempt.

Table D Applicant and interviewer top positives and negatives V16.02.23

| Applicant                    |                                                                                                                                                                      |           |                     |                                                                                                                                                                                                                                                                                                                                                                                                                              |
|------------------------------|----------------------------------------------------------------------------------------------------------------------------------------------------------------------|-----------|---------------------|------------------------------------------------------------------------------------------------------------------------------------------------------------------------------------------------------------------------------------------------------------------------------------------------------------------------------------------------------------------------------------------------------------------------------|
| Positives                    |                                                                                                                                                                      |           |                     |                                                                                                                                                                                                                                                                                                                                                                                                                              |
| Theme                        | Sub theme detail                                                                                                                                                     | N=158 (%) | % of total comments | Illustrative quote                                                                                                                                                                                                                                                                                                                                                                                                           |
| Ease                         | Access, intuitive, convenient, flexible, simple                                                                                                                      | 63 (40)   | 21                  | <i>"Quick, not time consuming, simple"</i><br><i>"Flexible, you can do it at your own time. It reduces stage fright. It is convenient, you can do it in your own home..."</i>                                                                                                                                                                                                                                                |
| Reduced stress               | More relaxed in own home, take my time, breaks available, start when wish                                                                                            | 45 (28)   | 15                  | <i>"Its more relaxing to be in your own home instead of a new environment which for me is much less intimidating resulting in perhaps me performing better in the interview".</i><br><i>"... there is no external party criticising you in the moment, something which personally takes away a fair amount of nerves and stress from the process..."</i>                                                                     |
| Fairer                       | Reduced costs (travel), reduced time away from other responsibilities (caring), the practice portal and availability of question text helped neurodiverse applicants | 39 (25)   | 13                  | <i>"Its much easier in regard to travel for those who live far away, don't have the funds or time or who have other commitments".</i><br><i>"Reduces the possibility of bias during the interview process".</i><br><i>"More inclusive".</i><br><i>"Another great thing about this was I could do a practice question to get used to the layout of the interview, so I wasn't going into the interview completely blind".</i> |
| 'Meet' staff                 | Able to see more of the university's community                                                                                                                       | 9 (7)     | 3                   | <i>"I liked that there were 7 different people asking the questions..."</i>                                                                                                                                                                                                                                                                                                                                                  |
| Covid safe                   | Travel not required                                                                                                                                                  | 2 (1)     | 1                   | <i>"Considering the situation with the pandemic, the online interview has helped to continue the process of admissions in a positive way..."</i>                                                                                                                                                                                                                                                                             |
| Negatives                    |                                                                                                                                                                      |           |                     |                                                                                                                                                                                                                                                                                                                                                                                                                              |
| Theme                        | Sub theme detail                                                                                                                                                     | N=140 (%) | % of total comments | Illustrative quote                                                                                                                                                                                                                                                                                                                                                                                                           |
| Limited direct communication | Less personal, no conversation                                                                                                                                       | 48 (34)   | 16                  | <i>"... Impersonal, I feel like I cant make a connection or read the interviewers body language in the interview which I feel doesn't allow me to act how I usually do, and it felt unnatural".</i>                                                                                                                                                                                                                          |

| MMI                                 | Pressure felt due to the timed methodology, presence of the countdown timer, lack of question face validity. | 45 (32)   | 15                  | <i>"4 minutes per question was quite pressuring to fill"</i><br><i>"Ticking down time was off-putting".</i><br><i>"Could have asked more personal questions such as why this university and tell us about yourself, there was too many scenario questions which quite put us on the spot".</i> |
|-------------------------------------|--------------------------------------------------------------------------------------------------------------|-----------|---------------------|------------------------------------------------------------------------------------------------------------------------------------------------------------------------------------------------------------------------------------------------------------------------------------------------|
| Anticipated technical issues        | Wi-Fi cut out                                                                                                | 27 (19)   | 9                   | <i>"Technical issue (my screen froze) potential upload failure, potential loss of internet connection".</i>                                                                                                                                                                                    |
| Don't get vibe of staff             | Not directly meeting staff                                                                                   | 2 (1)     | 1                   | <i>"Lack of interaction between the student-tutor, the dialogue"</i>                                                                                                                                                                                                                           |
| Cannot ask questions                |                                                                                                              | 18 (13)   | 6                   | <i>"Not personalised, not able to ask questions"</i>                                                                                                                                                                                                                                           |
|                                     |                                                                                                              |           |                     |                                                                                                                                                                                                                                                                                                |
| Interviewer                         |                                                                                                              |           |                     |                                                                                                                                                                                                                                                                                                |
| Positives                           |                                                                                                              |           |                     |                                                                                                                                                                                                                                                                                                |
| Theme                               | Sub theme detail                                                                                             | N=132 (%) | % of total comments | Illustrative quote                                                                                                                                                                                                                                                                             |
| Convenient                          | Can prioritise workload.<br>Flexible<br>Quicker<br>Less stressful                                            | 82 (62%)  | 37                  | <i>"Efficient, less time consuming and able to prioritise your workload accordingly and complete interviews in chunks as opposed to one long stint"</i><br><i>Don't have the issue of trying to find someone to cover like when another meeting comes up at the same time..."</i>              |
| Fairer                              | Less unconscious bias<br>Reduced travel [costs]                                                              | 18 (14%)  | 7                   | <i>"Reduced bias from different people asking the questions".</i><br><i>"Equity... no student gets help with prompts more than others"</i>                                                                                                                                                     |
| East to navigate                    | Simple                                                                                                       | 12 (9%)   | 5                   | <i>"Easy to use with clear instructions"</i>                                                                                                                                                                                                                                                   |
| Benefits applicants                 | Less stressed in own environment                                                                             | 12 (9%)   | 6                   | <i>"Separating the two events [interview/applicant day] will help manage anxiety and stress"</i>                                                                                                                                                                                               |
| Applicant assessment                | Can get a [better] sense of the applicant                                                                    | 4 (3%)    | 2                   | <i>"I feel I can get a sense of the applicant through this process".</i>                                                                                                                                                                                                                       |
| Less worried about technical issues | Not one time/date dependent                                                                                  | 3 (2%)    | 2                   | <i>"Much less stressful as I dont have to worry about the internet connection".</i>                                                                                                                                                                                                            |
| Ability to rewatch                  | If cause for concern'                                                                                        | 1 (1%)    | 1                   | <i>"Ability to rewatch for clarification".</i>                                                                                                                                                                                                                                                 |
|                                     |                                                                                                              |           |                     |                                                                                                                                                                                                                                                                                                |
| Negatives                           |                                                                                                              |           |                     |                                                                                                                                                                                                                                                                                                |

| Theme                                                | Sub theme detail                                                                                                            | N=90 (%) | % of total comments | Illustrative quote                                                                                                                                                                                                                                                            |
|------------------------------------------------------|-----------------------------------------------------------------------------------------------------------------------------|----------|---------------------|-------------------------------------------------------------------------------------------------------------------------------------------------------------------------------------------------------------------------------------------------------------------------------|
| Less personal                                        | Don't get feel for applicant                                                                                                | 27 (30%) | 12                  | <i>"I think it's better for applicants to speak to someone in person"</i><br><i>"I question whether it produces the same quality and depth of response"</i> .                                                                                                                 |
| Critique of MMI methodology                          | Timed circuit/countdown timer                                                                                               | 22 (24%) | 10                  | <i>"Encourages to me to make a snap decision"</i><br><i>"Cant ask follow-on questions...permits no probing"</i> .                                                                                                                                                             |
| Communication assessment and build rapport difficult | Less able to assess non-verbal communication, social skills, spontaneous cognitive ability.                                 | 21 (23%) | 9                   | <i>"Little in the way of holism"</i> .<br><i>"Disconnect perhaps for applicants"</i> .<br><i>"Does not allow markers to assess a candidates ability to respond and adapt to others"</i> .                                                                                     |
| Limited support for nervous/stressed applicant       | Can not help if upset or stressed                                                                                           | 8 (9%)   | 4                   | <i>"No opportunity to provide any support if the candidate appears upset.. if they are struggling mentally or emotionally"</i> ..                                                                                                                                             |
| Tech related process concerns                        | Tech issues<br>Stress of Zoom/Teams online mode<br>Repetitive watching videos<br>Disadvantages those not familiar with tech | 4 (5%)   | 2                   | <i>"Robotic process"</i><br><i>"Repetitive and boring watching multiple videos"</i><br><i>"Some people find Teams/Zoom very stressful and therefore we dont see the best of the candidate"</i> .<br><i>"Technical issues for some student may give them a disadvantage"</i> . |
| Did not have any                                     | Stated 'none'                                                                                                               | 5 (6%)   | 2                   | <i>"Don't have any"</i><br><i>"None to mention"</i> .                                                                                                                                                                                                                         |
| University marketing                                 | Does not show university as warm and welcoming                                                                              | 3 (3%)   | 1                   | <i>"We are very nice and they do not see that"</i><br><i>"Current students often state they chose Surrey due to the friendliness of the staff when first meeting them, my concern is if this is the first impression"</i> .                                                   |

### **Acceptability (Interviewers)**

Sixty-five interviewers took part in the online evaluation representing a 71% response rate. The majority were white British female university staff, over the age of 45 years with no declared disability (Table A). This is representative of the University Faculty staff profile which is located in the Southeast of the UK.

Ninety-six percent (n=62) of interviewers found the system intuitive, easy to use and reported a perceived reduction in their stress. They primarily attributed this to increased convenience and flexibility. A 70%-time reduction was independently reported by our Recruitment and Admissions Managers. They estimated this based on the time spent on other interview approaches (face-to-face MMIs, Zoom-facilitated MMIs compared with our asynchronous MMIs; categorised into pre-interview communications, set up, staff recruitment (including covering sick time), interview facilitation and post-interview communications. The majority of the time saving was ascribed directly to the asynchronous modality which removed the need for staff to either facilitate face-to-face or online live interviews. Additionally, the asynchronous approach alleviated the pressures of last-minute non-availability of interviewers particularly practice partners as they were not tied to one scheduled day/time but had a time period (1 week) within which they could assess the interview recordings.

None of the interviewer assessors stated that they had used an asynchronous online MMI previously. Almost all (96%) found it easy to use and the user interface intuitive (92%). Less than 10% reported technical issues other than download issues which were resolved. Five percent were 'not accepting' of using the asynchronous MMI in the future.

We were interested to better understand whether interviewers felt communication could be assessed in an asynchronous modality. Thirty-three percent said 'yes', 54% 'somewhat' with 13% of respondents (n=6) responded 'no'. To generate more in depth insights we asked interviewers their top positives and negatives of the system. These are presented in Table D. We received 132 positive and 90 negative comments. The majority of positive comments (94%) related to perceived convenience (62%), fairness (14%) ease of navigation (9%) and benefits for the applicant (9%). Negative comments were split more evenly into perceptions of their being less personal (30%), critique of MMI methodology (24%), limited communication assessment and ability to build rapport (23%), and 5% had technology-related process concerns. Six percent cited 'none'.

### **Discussion**

With ten principles for fairness designed-in these findings suggest the online interview is reliable, fair, time-efficient, and acceptable. The results of the factor analyses infer that there are scenario-level effects but that that these all relate to an underlying general factor indicative that the process is assessing different dimensions/constructs relevant to health care. These could be method effects or alternatively conceptualised as representing different aspects of the interpersonal procedural knowledge required to perform well on the MMI.



This platform is the only known custom built asynchronous online interview emulating the MMI methodology. Cognisant of Gilliland's<sup>21</sup> procedural and distributive justice rules, our aim was to optimise applicant accessibility through building principles for fairness into the MMI design and system set up. The reliability results and usability and acceptability evaluation signal this was largely achieved. More broadly however, organisations should carefully consider how even the act of inviting an applicant to complete an asynchronous interview may impact justice perceptions and attitudes. As with any other selection approach, applicants may question whether the method is a fair way to inform selection decisions<sup>30</sup>. These data suggest the configuration of our asynchronous MMI resulted in an equitable process particularly with the familiarisation enabled through the practice portal<sup>15</sup>. Rice<sup>31</sup> (p452) suggests that social presence or the "degree to which a medium is perceived as conveying the presence of the communicating participants" impacts on applicant acceptability. Social presence plays a central role in trust, enjoyment, and the perceived usefulness of the technological medium<sup>30</sup>. There was by definition an absence of actual social presence in the asynchronous modality. However, we sought to mitigate this through softening the intersection between human and technology through design. The majority said they found the system intuitive/very intuitive and simple to use. This infers that the user interface design and inclusive language may have contributed towards a positive experience.

Applicants in this study (>66%) were either accepting or very accepting of the online asynchronous MMI with around one third (37%) agreeing we should 'definitely return' to face-to-face interviews. Notably, only 2% (n= 2) of applicants said they were 'not at all accepting' of the asynchronous MMI. The majority of applicants were 20 years or under. It could be suggested that a younger demographic are more familiar with and accepting of online technology and see it as part of their day-to-day lives. However, these data signal that there was no difference in reliability for those under 20 years compared to over 20 years old and that applicant performance was not impacted by their age.

Applicants' experiences, particularly perceptions of fairness, are of paramount concern for universities. The implications of fairness can extend to post-interview outcomes including offer/acceptance rates. It has been suggested that applicants who perceive that recruitment and selection processes are fair are more attracted to organisations<sup>32,33</sup>. Concurring with Brenner et al<sup>12</sup> applicants reported 'perceived fairness' as one of their top three positives of the asynchronous interview system. Their reasons include reduced travel costs and time away from caring responsibilities, as well as enhanced familiarisation of the process through the practice portal. MMI interviews were pre-recorded using inclusive language by diverse staff, representative of the University community. Additional time and an intuitive system user interface appeared to help meet the needs of neurodiverse applicants.

Incorporating the ten fairness principles were not difficult as many were low-cost design features that appeared to be impactful. We suggest these should become a default approach for online interviews used in health professional selection to enable applicant performance optimisation. In view of the paucity of published evidence<sup>15</sup> these novel insights are informative as we inevitably move toward a technology-augmented future where asynchronous video interviews are considered a modality that is here to stay<sup>15</sup>.

We received a 60:40 ratio of positive to negative comments from interview assessors. The largest contributor (62%) to the overall feedback related to positivity around convenience including ability to prioritise workload, flexibility, speed, and reduced stress. This was followed by ease of navigation and reduced bias. These findings corroborate evidence garnered outside the field of healthcare where asynchronous interviews have been found to be faster, cheaper, require less employee time and open the applicant funnel to allow more people to be interviewed than would otherwise have had the opportunity<sup>15</sup>. Nevertheless, communication skills are central to the role of a health professional and are assessed as a generic skill/attribute in each MMI question at this university. One sixth of interview assessors said they did not feel communication skills could be assessed while over a third stated they could in the asynchronous modality. Further research is warranted to better understand the intersection between humans and technology including barriers and enablers to effective communication and communication assessment.

The largest contributing negative comment (30%) focused on a perception that the process was less personal. We might have anticipated this to be higher. Steps being considered to enhance personal connection include increasing the number of 'offer holder-days' provided by the university where applicants are invited onto campus to engage with staff without the stress of an interview clouding the experience. Further research evaluating the effectiveness of this strategy is suggested.

### **Study limitations**

Invitations to review the system were sent out after applicants received notification of their interview outcome. We understand that the interview outcome may have impacted on applicants' perception of the process. In this study, we were required to adhere to the university's preference. This will be reviewed in the design of any future study to minimise sampling and response bias.

The study was a theoretically driven mixed-methods approach with multi-programme perspectives offering important insights. However, we acknowledge the limitations of a single site design, but this was an essential step ahead of a planned large multi-site international evaluation.

While the sample size is large, the low response rate from applicants is a potential limitation and may infer selection bias. Users' views of such a technology can be impacted by many factors outside the scope of this research for example past experiences for which we were unable to account for.

It was not possible to conduct a comparison study 'pre/post system optimisation'. Covid necessitated a move to online interviews in unprecedented times. Data were not collected on applicant or interviewer views at the time given the burdens they were already facing. During that time however, we explored how fairness could be optimised through a review of published literature with findings embedded in our system (Appendix A). In a high stakes admission process, it would be ethically wrong to conduct a prospective study now to compare with and without the 10 principles for fairness given the apparent benefits. Data is not available retrospectively due to the circumstances around Covid.

Collapsing applicant data into UK/Ireland and Non-UK Ireland was a necessary pragmatic decision based on lack of consistent reporting of ethnicity between the university (who did not routinely retain applicant ethnicity data until enrolment) and the UK University Central Admissions System (UCAS).

### **Rigour**

In spite of reassurances in all communications, we were mindful that applicants might be concerned that their review of the interview process might impact on their interview outcome. We therefore

sent out the invitation to evaluation once offer/reject decisions had been communicated to applicants.

All data in this evaluation were independently analysed and peer reviewed by multiple authors (AC, JH, SR, PT). In the qualitative content analysis, two authors (AC, SR) undertook the analysis independently. A <5% difference was noted between authors' findings. A compromise was mutually agreed in instances where this occurred.

## **Conclusion**

With ten principles for fairness designed in, these findings suggest the asynchronous online interview is reliable, equitable, time-efficient, and acceptable. In the absence of generically available consensus guidance on how fairness can be optimised in online interviews, these findings have substantial implications for the future configuration of online interviews across health professions. Embedding fairness to the design of online interviews is relatively straightforward and low cost to implement. These data advance our understanding which is vital as we inevitably move towards a technology augmented future in the context of global workforce pressures.

## References

1. Council of Deans of Health Equality, Diversity, and Inclusion:  
<https://www.councilofdeans.org.uk/category/policy/equality-diversity-and-inclusion/>.  
Accessed 06.03.23.
2. United Nations Department of Economic and Social Affairs 17 Sustainable Development Goals: <https://sdgs.un.org/goals>. Accessed 06.03.23.
3. <https://www.oecd.org/publications/the-post-covid-19-rise-in-labour-shortages-e60c2d1c-en.htm>
4. Sabesan V, Kapur N, Zemanek K, Levitt D, Vu T, Erp A. Implementation and evaluation of virtual multiple mini-interviews as a selection tool for entry into paediatric postgraduate training: A Queensland experience. Medical Teacher Published online: 30 Aug 2021.  
  
<https://doi.org/10.1080/0142159X.2021.1967906>
5. Cleland J, Chu J, Lim S, Low J, Lowe-Beer N, Kwek T. COVID-19: designing and conducting an on-line mini-multiple interview (MMI) in a dynamic landscape. Medical Teacher. 2020. May: 1-5. <https://doi.org/10.1080/0142159X.2020.1762851>.
6. Kok K, Chen L, Idris F, Mumin N, Ghani H, Zulkipli. Conducting multiple mini-interviews in the midst of COVID-19 pandemic. *Korean J Med Educ*. 2020 Dec; 32(4): 281–289. Published online 2020 Oct 28. doi: [10.3946/kjme.2020.175](https://doi.org/10.3946/kjme.2020.175).
7. Fuller, R., Goddard, V., Nadarajah, V., Treasure-Jones, T. Yeates, P., Scott, K., Webb, A., Valter, K., Pyorala, E. 2022. Technology enhanced assessment: Ottawa consensus statement and Recommendations. Medical Teacher Pages 836-850  
<https://doi.org/10.1080/0142159X.2022.2083489>
8. Patterson, F, Roberts, C, Hanson, M, Hampe, W, Eva, K, Ponnampereuma, G, Magzoub, M, Tekianhand, A, Cleland, J. Ottawa consensus statement: Selection and recruitment to the healthcare professions. Medical Teacher. 2018;40(11):1-11.  
[10.1080/0142159X.2018.1498589](https://doi.org/10.1080/0142159X.2018.1498589)
9. Eva K, Rosenfeld J, Reiter H, Norman G. An admissions OSCE: the multiple mini-interview. *Medical Education*. 2004; 38: 314-326.
10. Yusoff J. Multiple Mini Interview as an admission tool in higher education: Insights from a systematic review. *J Taibah Univ Med Sci*. 2019 Jun; 14(3): 203–240.  
doi: [10.1016/j.jtumed.2019.03.006](https://doi.org/10.1016/j.jtumed.2019.03.006)
11. Selvam R, Hu R, Musselman R, Raiche I, Mclsaac, D, Moloo H (2021) Video-based interviewing in Medicine: A Scoping Review. Doi: <https://doi.org/10.21203/rs.3.rs-468538/v1>
12. Brenner, F. S., Ortner, T. M., & Fay, D. (2016). Asynchronous video interviewing as a new technology in personnel selection: The applicant's point of view. *Frontiers in Psychology*, 7, 863.
13. Huppert L A, Hsiao E C, Cho K C *et al*. Virtual interviews at graduate medical education training programs determining evidence-based best practices. *Acad Med* 2020. doi: [10.1097/ACM.0000000000003868](https://doi.org/10.1097/ACM.0000000000003868).

14. Vining CC, Eng OS, Hogg ME, et al. Virtual Surgical Fellowship Recruitment During COVID-19 and Its Implications for Resident/Fellow Recruitment in the Future. *Ann Surg Oncol*. 2020;27(Suppl 3):911- 915. doi:10.1245/s10434-020-08623-2
15. Lukacik, E., Bourdage, J., Roulin, N. 2022. Into the void: A conceptual model and research agenda for the design and use of asynchronous video interviews. *Human Resources Management Review* 32 , 100789
16. Linos E, Reinhard J, Ruda S. Levelling the playing field in police recruitment: Evidence from a field experiment on test performance. *Public Administration*. 2017;95(4):943-956.
17. <https://www.linkedin.com/business/talent/blog/future-of-recruiting>
18. Bambra, C., Joyce, K., Bellis, M., Greatley, A., Greengross, S., Hughes, S., Lincoln, P. Lobstein, T., Naylor, C., Salay, R. Wiseman, M., Maryon-Davis, A. 2010 Reducing health inequalities in priority public health conditions: using rapid review to develop proposals for evidence-based policy. *Journal of Public Health*, Volume 32, Issue 4, December 2010, Pages 496–505, <https://doi.org/10.1093/pubmed/fdq028>
19. [http://mixedmethodsappraisaltoolpublic.pbworks.com/w/file/fetch/127916259/MMAT\\_2018\\_criteria-manual\\_2018-08-01\\_ENG.pdf](http://mixedmethodsappraisaltoolpublic.pbworks.com/w/file/fetch/127916259/MMAT_2018_criteria-manual_2018-08-01_ENG.pdf)
20. Olsen E, Eoyang G. Facilitating organisational change: lessons from complexity science. San Francisco: Jossey-Bass; 2001.
21. Gilliland, S. 1983 The perceived fairness of selection systems: an organisational justice perspective. *Academy of Management Review* Vol 18, No 4, pp 694-734
22. Qualtrics accesible at: <https://www.qualtrics.com/uk/>
23. Stata accesible at: <https://www.stata.com/>
24. Horn, J. L. (1965). A Rationale and Test for the Number of Factors in Factor Analysis. *Psychometrika*, 30, 179-185. <https://doi.org/10.1007/BF02289447>
25. Timmerman, M. E., & Lorenzo-Seva, U. (2011). Dimensionality assessment of ordered polytomous items with parallel analysis. *Psychological Methods*, 16(2), 209–220. <https://doi.org/10.1037/a0023353>
26. Lorenzo-Seva, U., Ferrando, P.J., 2006. FACTOR: a computer program to fit the exploratory factor analysis model. *Behavior Research Methods* 38, 88–91.
27. MPlus version 8. Los Angeles, CA: Muthén & Muthén, 2022
28. Hsieh H, Shannon S. Three Approaches to Qualitative Content Analysis. *Qualitative Health Research*. November.2005. [http:// doi.org/10.1177/1049732305276687](http://doi.org/10.1177/1049732305276687)
29. Schmid, J., & Leiman, J. M. (1957). The development of hierarchical factor solutions. *Psychometrika*, 22(1), 53–61.

30. Schinkel, S., van Vianen, A., & Van Dierendonck, D. (2013). Selection fairness and outcomes: A field study of interactive effects on applicant reactions. *International Journal of Selection and Assessment*, 21(1), 22–31.
31. Rice, R. E. (1993). Media appropriateness: Using social presence theory to compare traditional and new organizational media. *Human Communication Research*, 19(4), 451–484.
32. Oh, C. S., Bailenson, J. N., & Welch, G. F. (2018). A systematic review of social presence: Definition, antecedents, and implications. *Frontiers in Robotics and AI*, 5, 114.
33. Chapman, D. S., Uggerslev, K. L., Carroll, S. A., Piasentin, K. A., & Jones, D. A. (2005). Applicant attraction to organizations and job choice: A meta-analytic review of the correlates of recruiting outcomes. *Journal of Applied Psychology*, 90(5), 928–944. Chapman, D. S., Uggerslev, K. L., & Webster, J. (2003). Applicant reactions to face-to-face and technology
34. Truxillo, D. M., Bauer, T. N., Campion, M. A., & Paronto, M. E. (2002). Selection fairness information and applicant reactions: A longitudinal field study. *Journal of Applied Psychology*, 87(6), 1020–1031.
