# Supplementary material for: Cross-sectional evaluation of an asynchronous Multiple Mini Interview (MMI) in selection to health professions training programmes with ten principles for fairness built-in
Source: medRxiv preprint, doi:10.1101/2023.03.09.23287032, version 1 (2023-03-13)

Appendix 2. Estimated hierarchical confirmatory factor analytic (CFA) model for the SAMMI responses, with a general factor (g) and seven specific factors (f1 to f7), the latter representing the seven questions in the interview. Standardised factor loadings are shown.

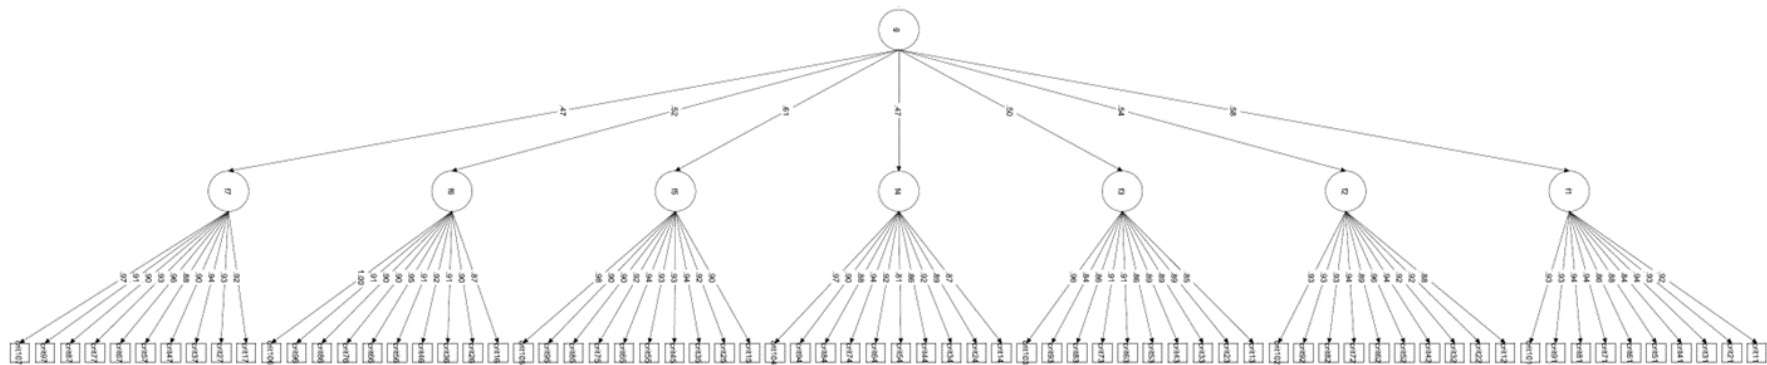

Supplement: Appendix 3 [file 287032_file04.pdf]
