# Supplementary material for: Cross-sectional evaluation of an asynchronous Multiple Mini Interview (MMI) in selection to health professions training programmes with ten principles for fairness built-in
Source: bioRxiv or medRxiv preprint supplement (doi:10.1101/2023.03.09.23287032), 2023-03-13
Supplement: Supplementary file [file media-2.pdf]

Appendix 1. Results of a parallel analysis using Pearson correlations on the response data to the SAMMI MMI.

| Number of postulated factors | Mean of real data % of variance | Mean of random % of variance | 95 percentile of random % of variance |
|------------------------------|---------------------------------|------------------------------|---------------------------------------|
| 1                            | 29.2*                           | 2.9                          | 3.1                                   |
| 2                            | 11.1*                           | 2.8                          | 3.0                                   |
| 3                            | 9.5*                            | 2.8                          | 2.9                                   |
| 4                            | 8.3*                            | 2.7                          | 2.8                                   |
| 5                            | 7.6*                            | 2.6                          | 2.7                                   |
| 6                            | 7.4*                            | 2.6                          | 2.7                                   |
| 7                            | 6.2*                            | 2.5                          | 2.6                                   |
| 8                            | 1.1                             | 2.5                          | 2.5                                   |
| 9                            | 1.0                             | 2.4                          | 2.5                                   |

\*Percentage of variance in the responses explained by the number of factors in the real data exceeded that for the random data.
